# Supplementary material for: l-Arginine Induces White Adipose Tissue Browning—A New Pharmaceutical Alternative to Cold
Source: MDPI journal article supplement (doi:10.3390/pharmaceutics14071368), 2022-06-28
Supplement: s1 [file s1]

## Western blot

**Supplementary Figure S1.** Images of whole blots against endothelial nitric oxide synthase (eNOS), inducible nitric oxide synthase (iNOS), 3-nitrotyrosine (3-NT), arginase I, arginase II, hormone sensitive lipase (HSL), adipose triglyceride lipase (ATGL), monoacyl-glycerol acyltransferase 1 (MGAT1), carnitine palmitoyltransferase 1 (CPT1), proliferating cell nuclear antigen (PCNA), nuclear factor erythroid 2-related factor 2 (Nrf2), uncoupling protein 1 (UCP1), nuclear respiratory factor 1 (NRF1), peroxisome proliferator-activated receptor- $\alpha$  (PPAR $\alpha$ ), acyl-CoA dehydrogenase medium chain (ACADM) and  $\beta$ -actin for retroperitoneal white adipose tissue (rpWAT). Each image is representative of three independent trials, showing one representative band per group (control, cold-exposed for 1 day, cold-exposed for 3 days, cold-exposed for 7 days, L-arginine treated for 1 day, L-arginine treated for 3 days, L-arginine treated for 7 days, respectively). Prior to loading, six samples from each group were pooled to obtain one sample shown in blots.

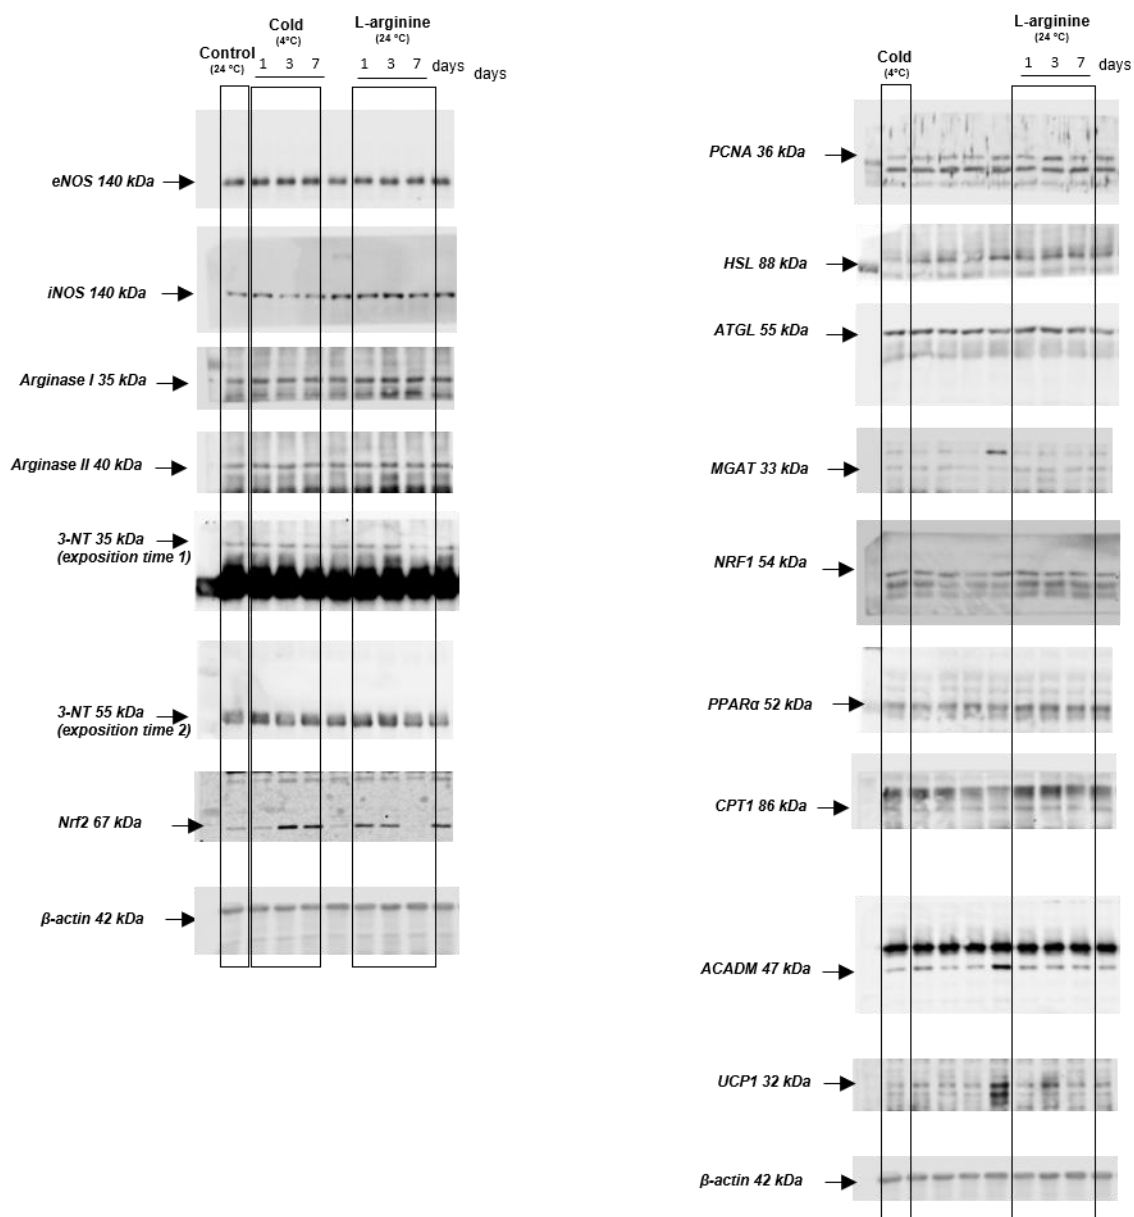

**Supplementary Table S1.** Primers sequences and cycling conditions for RT-PCR.

| Gene            | Sequence                                 | Cycle number |
|-----------------|------------------------------------------|--------------|
| <i>PGC-1α</i>   |                                          |              |
| Forward:        | 5′ - TGC CCC TGC CAG TCA CAG GA - 3′     | 45           |
| Reverse:        | 5′ - GCT CAG CCG AGG ACA CGA GG - 3′     |              |
| Cycle protocol: | 15″ at 95 °C, 30″ at 60 °C, 30″ at 72 °C |              |
| <i>Cidea</i>    |                                          |              |
| Forward:        | 5′ - TCA GAC CCT AAG AGA CAA CAC A - 3′  | 40           |
| Reverse:        | 5′ - CAT TGA GAC AGC CGA GGA - 3′        |              |
| Cycle protocol: | 15″ at 95 °C, 30″ at 60 °C, 20″ at 72 °C |              |
| <i>Cd137</i>    |                                          |              |
| Forward:        | 5′ - AAG CAA CCA TTT AAG AAG GCG G - 3′  | 40           |
| Reverse:        | 5′ - GGA TGG CAC ATT ACA GCT CG - 3′     |              |
| Cycle protocol: | 15″ at 95 °C, 30″ at 60 °C, 20″ at 72 °C |              |
| <i>Tmem26</i>   |                                          |              |
| Forward:        | 5′ - GCT GTT CCT GTT GCA TTC CC - 3′     | 40           |
| Reverse:        | 5′ - GGA GAA AGC CAT TTG TAG CCT C - 3′  |              |
| Cycle protocol: | 15″ at 95 °C, 30″ at 60 °C, 20″ at 72 °C |              |
| <i>18 rRNK</i>  |                                          |              |
| Forward:        | 5′ - CAC GGA CAG GAT TGA CAG AT - 3′     |              |
| Reverse:        | 5′ - CAA ATC GCT CCA CCA ACT AA - 3′     |              |
